# Supplementary material for: Intracellular delivery of liposome-encapsulated Finland trityl radicals for EPR oximetry
Source: Royal Society of Chemistry journal article supplement (doi:10.1039/d0an00108b), 2020-01-01
Supplement: d0an00108b1.pdf [file d0an00108b1.pdf]

Electronic Supplementary Information for

## **Intracellular Delivery of Liposome-encapsulated Finland Trityl Radical for EPR Oximetry**

Xing Wang<sup>#,a,b</sup>, Chao Peng<sup>#,a</sup>, Ke He<sup>a</sup>, Kaiyun Ji<sup>a</sup>, Xiaoli Tan<sup>a</sup>, Guifang Han<sup>\*,a</sup>, Yanxia Liu<sup>\*,b</sup>, Yangping Liu<sup>a</sup>, Yuguang Song<sup>a,\*</sup>

<sup>a</sup>Tianjin Key Laboratory on Technologies Enabling Development of Clinical Therapeutics and Diagnostics, School of Pharmacy, Tianjin Medical University, Tianjin 300070, P. R. China.

<sup>b</sup>Department of Pharmacology, School of Basic Medical Sciences, Tianjin Medical University, Tianjin 300070, P. R. China

<sup>#</sup>These authors contributed equally to this work.

\*Corresponding authors: Yanxia Liu, Guifang Han, Yuguang Song

Email Address: [liuyanxia@tmu.edu.cn](mailto:liuyanxia@tmu.edu.cn);

[hanguifang@tmu.edu.cn](mailto:hanguifang@tmu.edu.cn);

[songyuguang@tmu.edu.cn](mailto:songyuguang@tmu.edu.cn)

Tel: +86 22 83336832

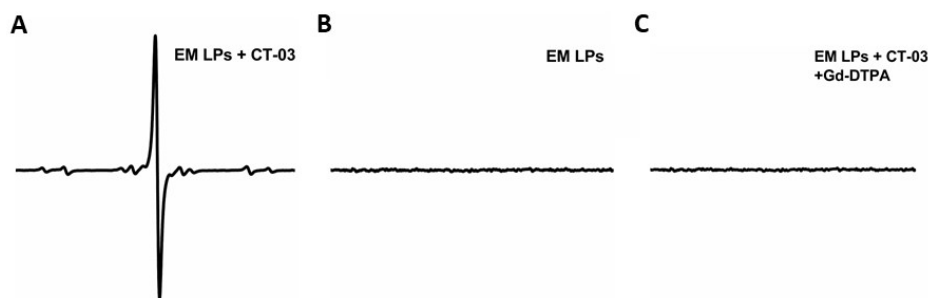

Fig. S1. EPR spectra of (A) free CT-03 (20  $\mu$ M) mixed with empty liposomes (EM LPs); (B) EM LPs alone; (C) free CT-03 (20  $\mu$ M), EM LPs and Gd-DTPA (20 mM) under aerobic conditions at room temperature.

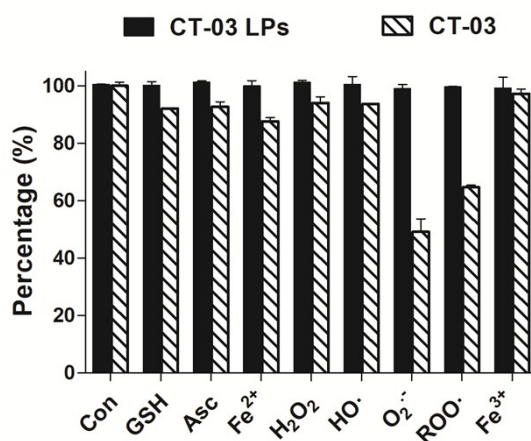

Fig. S2. Effect of various reactive species on free CT-03 (20  $\mu$ M) or CT-03 LPs (final concentration of CT-03 at 20  $\mu$ M) in PBS (20 mM, pH 7.4). GSH (1 mM), Asc (1 mM), and H<sub>2</sub>O<sub>2</sub> (1 mM). Fe<sup>III</sup>-NTA(0.1 mM) and H<sub>2</sub>O<sub>2</sub> (1 mM) was used to generate hydroxyl radical (HO<sup>•</sup>). Superoxide anion radical (O<sub>2</sub><sup>•-</sup>) was generated from XO (20 mUmL<sup>-1</sup>) and X (100  $\mu$ M) in the presence of DTPA (100  $\mu$ M). The alkylperoxyl radical was generated by thermolysis of 2,2'-azobis-2-methylpropanimidamidedihydrochloride (AAPH, 1 mM) at 37°C. The effect of various reactive species on CT-03 or CT-03 LPs was expressed as a percentage of EPR signal remaining after exposure to reactive species for 30 min. Each experiment was conducted three times, and the

error bars are small in some cases and within the symbols.

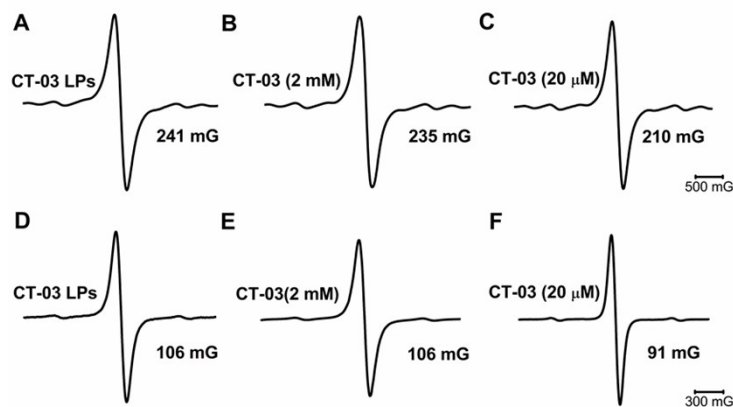

Fig.S3. EPR spectra of CT-03 LPs with the intraliposomal concentration of 2 mM for CT-03, free CT-03 at high (2 mM) or low concentrations (20  $\mu$ M) under aerobic (top) or anaerobic (bottom) conditions. EPR measurements under aerobic conditions were performed in 50  $\mu$ L capillary tubes, while the measurements under anaerobic conditions were carried out in a gas-permeable Teflon tube (i.d. = 0.8 mm). EPR parameters used under aerobic conditions: modulation frequency, 100 kHz; microwave power, 0.8mW; modulation amplitude, 0.15 G. EPR parameters used under anaerobic conditions: modulation frequency, 100 kHz; microwave power, 0.2mW; modulation amplitude, 0.03 G.)

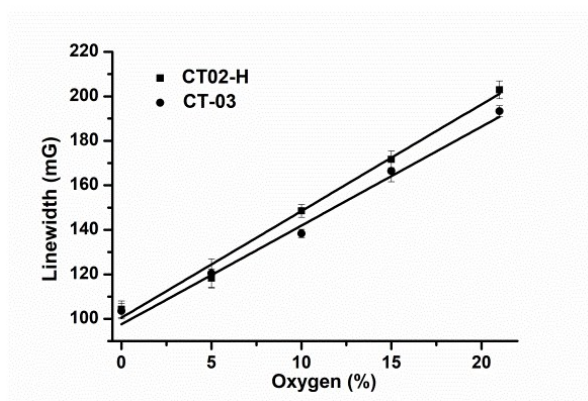

Fig.S4. Variations in the EPR line widths of CT02-H (extracellular, the low-field peak) and CT-03

(intracellular) with oxygen concentrations in the HUVECs suspensions. The data were linearly fitted using the following equations:  $y = 4.44x + 97.53$  (CT-03);  $y = 4.79x + 100.52$  (CT02-H), where  $x$  is oxygen concentration (%O<sub>2</sub>) and  $y$  the linewidth (LW, mG).

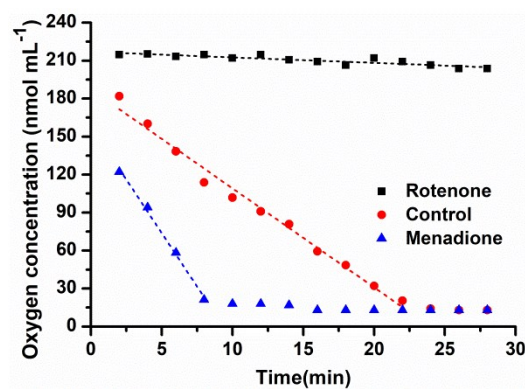

Fig.S5. Time-course of the variations of intracellular O<sub>2</sub> concentrations in HepG2 cells which were treated with rotenone (800 μM) or menadione (10 μM).
